# Supplementary material for: Optical temperature sensing properties and thermoluminescence behavior in Er-modified potassium sodium niobate-based multifunctional ferroelectric ceramics
Source: Royal Society of Chemistry journal article supplement (doi:10.1039/d2tc01268e), 2022-01-01
Supplement: d2tc01268e1.pdf [file d2tc01268e1.pdf]

## Supporting Information for

# Optical temperature sensing properties and thermoluminescence behavior in Er-modified potassium sodium niobate-based multifunctional ferroelectric ceramics

Wei Li<sup>1</sup>, Di Wang<sup>1</sup>, Xuefeng Li<sup>2</sup>, Peng Li<sup>1</sup>, Peng Fu<sup>1</sup>, Chengchao Hu<sup>1</sup>, Jigong Hao<sup>1,\*</sup>, Wei Li<sup>1,\*</sup>, Qiwei Zhang<sup>2,\*</sup>

<sup>1</sup>School of Materials Science and Engineering, Liaocheng University, Liaocheng 252059, China.

<sup>2</sup>Inner Mongolia Key Laboratory of Ferroelectric-related New Energy Materials and Devices, School of Materials and Metallurgy, Inner Mongolia University of Science and Technology, Baotou 014010, China.

\*Corresponding authors. E-mail addresses: haojigong@lcu.edu.cn (J. Hao); liwei\_727@163.com (W. Li); zqw8000@imust.edu.cn (Q. Zhang)

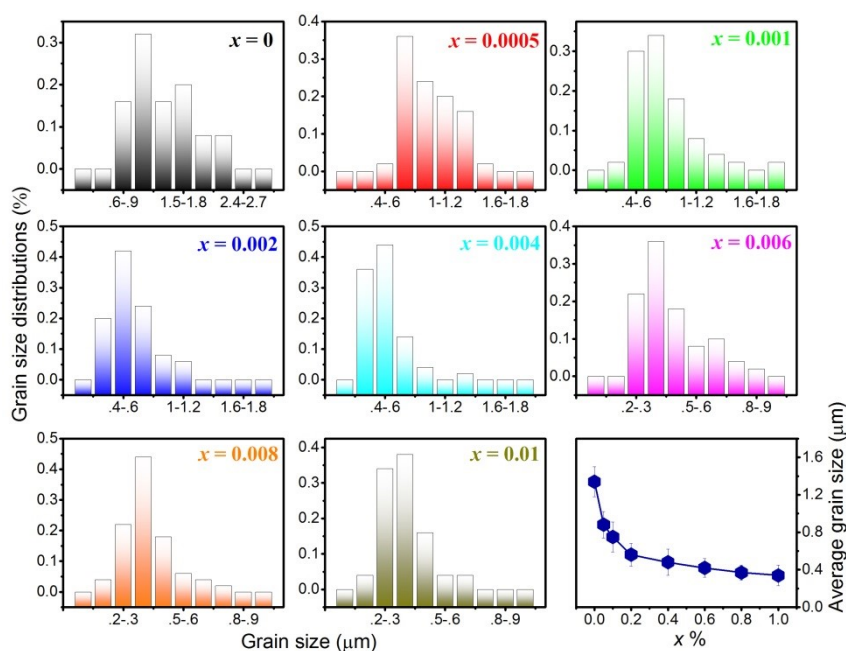

Fig. S1. The grain size distribution and the average grain size of  $x\text{Er}$  ceramics.

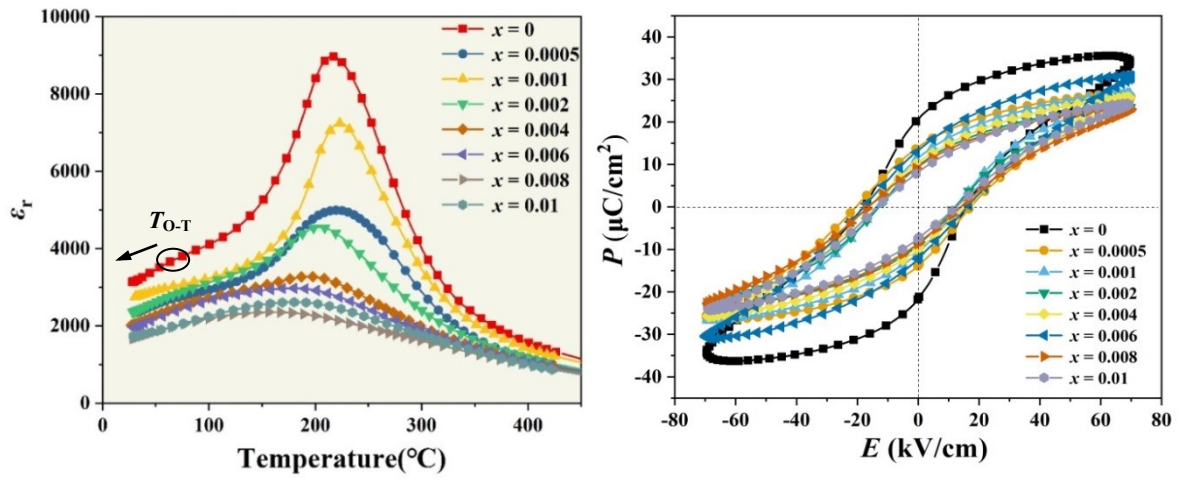

**Fig. S2.** (a) The dielectric constant ( $\epsilon_r$ ) as a function of temperature for the  $x$ Er ceramics recorded at 100 kHz. (b) The polarization-electric field hysteresis loop for the  $x$ Er ceramics recorded at room temperature and 10 Hz.

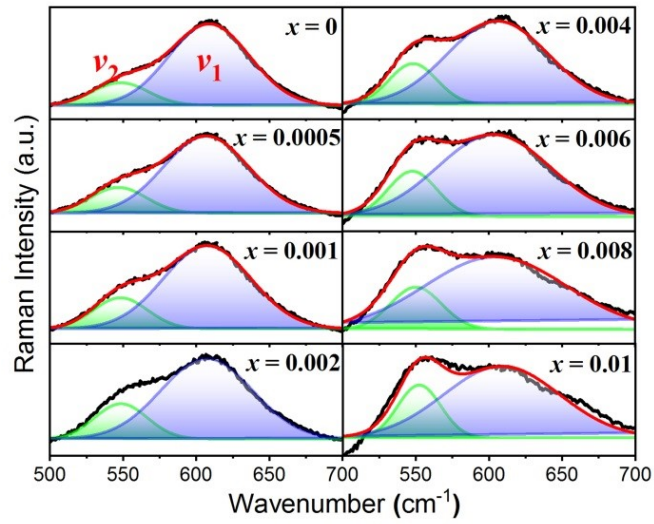

**Fig. S3.** The fitting results of Lorentz function of Raman peaks based on  $E_g$  ( $\nu_2$ ) and  $A_{1g}$  ( $\nu_1$ ) modes, for  $x$ Er ceramics.

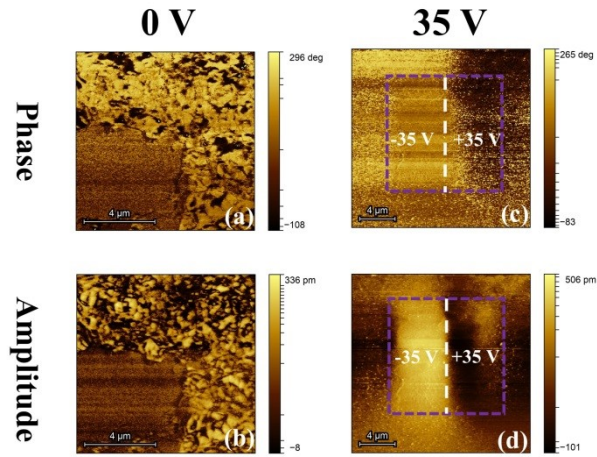

**Fig. S4.** The PFM images for amplitude and phase of the  $x\text{Er}$  ceramics with  $x = 0$  without poling and after poling with the dc voltage of  $\pm 35\text{V}$ .

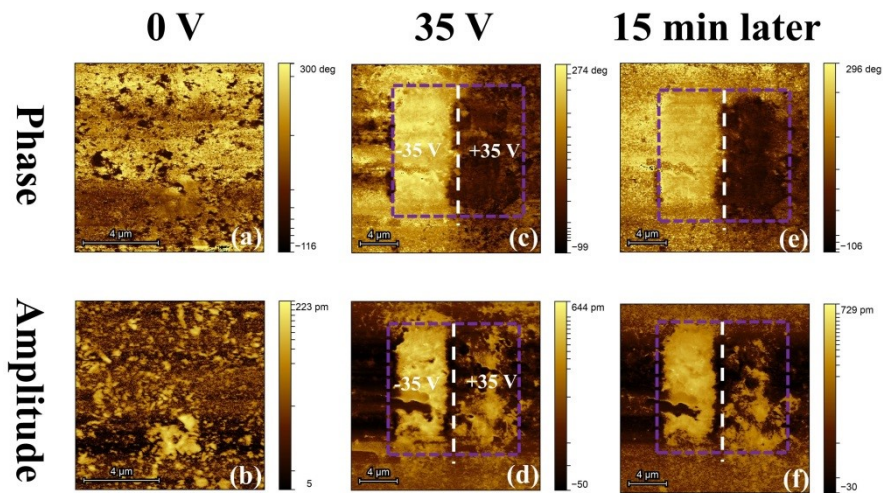

**Fig. S5.** The PFM images for amplitude and phase of the  $x\text{Er}$  ceramics with  $x = 0.004$  without poling and after poling with the dc voltage of  $\pm 35\text{V}$ .

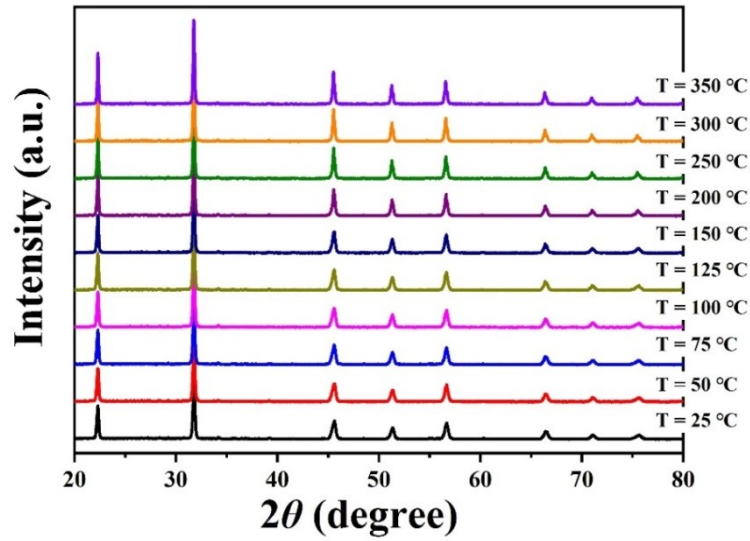

Fig. S6. The XRD patterns of 0.0005Er ceramic at different temperatures.

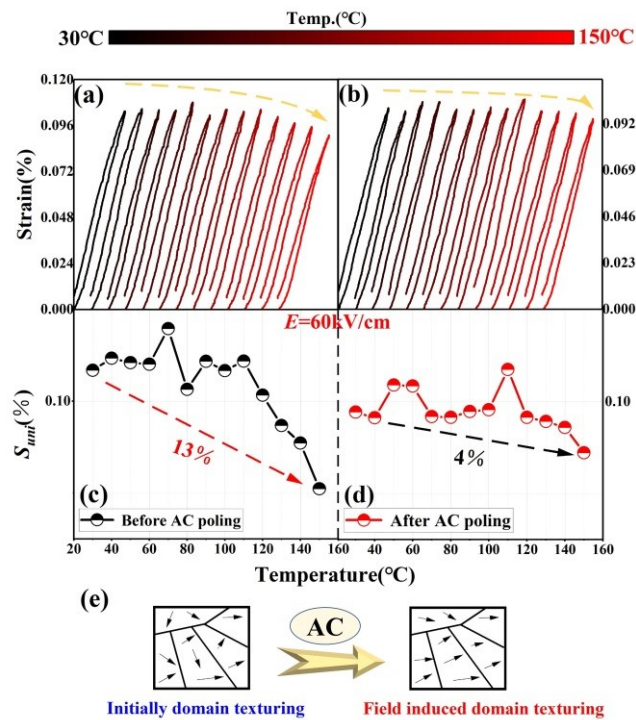

Fig. S7. (a,b) Unipolar strain curves of  $x\text{Er}$  ( $x = 0.001$ ) sample at different temperatures before and after poling, (c,d) Change of  $S_{uni}$  values with temperature for samples before and after poling. (e) The state of the domain and after poling.

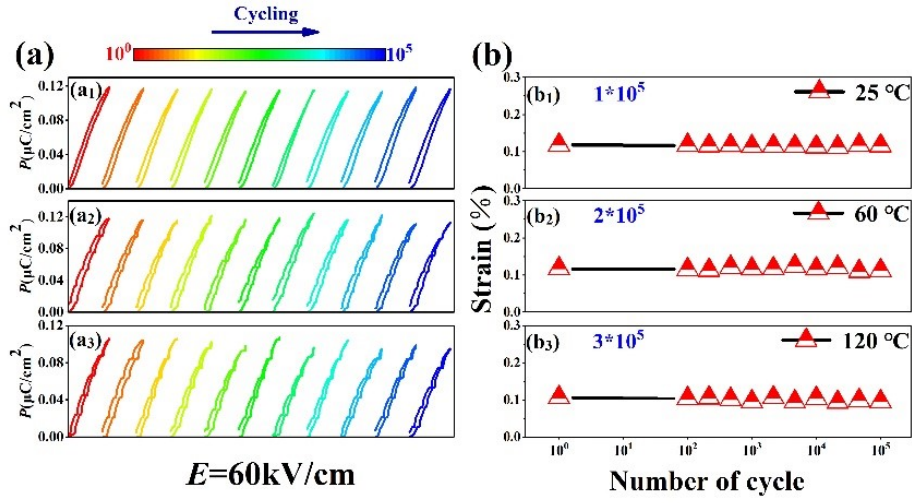

**Fig. S8.** The evolution of (a) unipolar  $S$ - $E$  curves and (b) unipolar  $S_{\text{umi}}$  values with electric field cycling at different temperatures, for  $x\text{Er}$  ( $x = 0.0005$ ) sample.

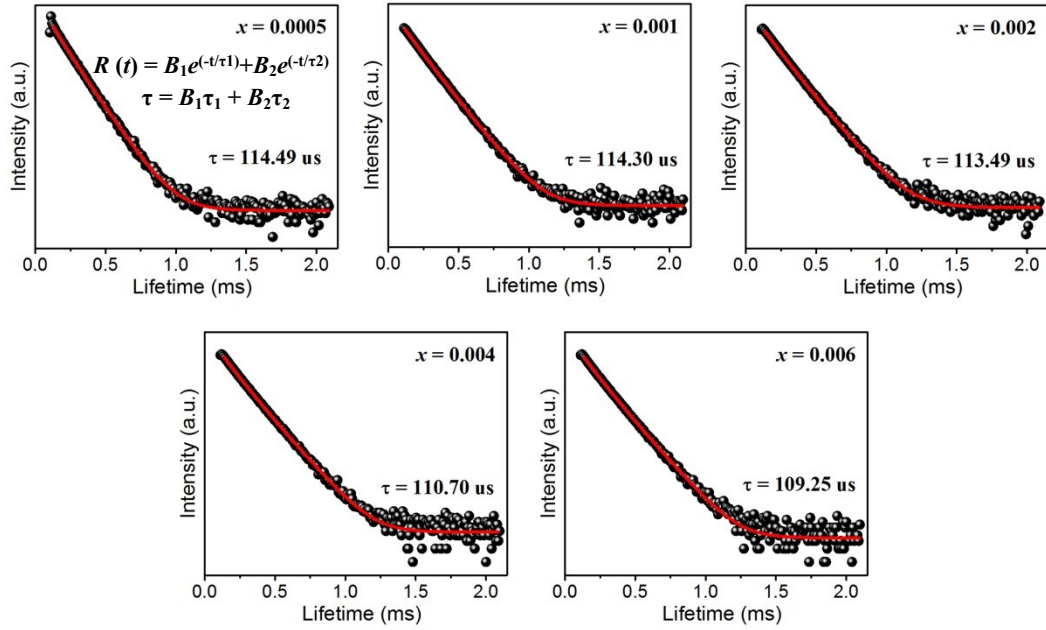

**Fig. S9.** The PL decay curves of the  $x\text{Er}$  samples.

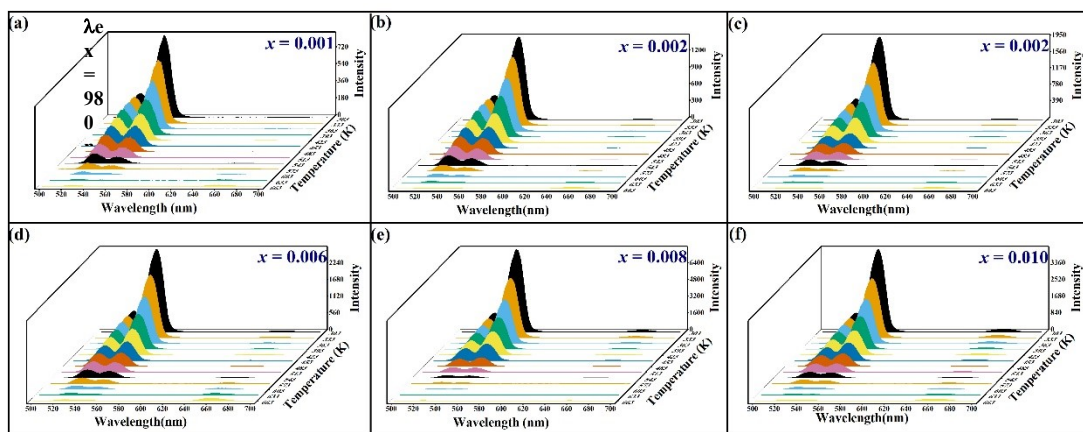

Fig. S10. UC emission spectra of  $x\text{Er}$  ceramics measured in the temperature range of 303–663 K.

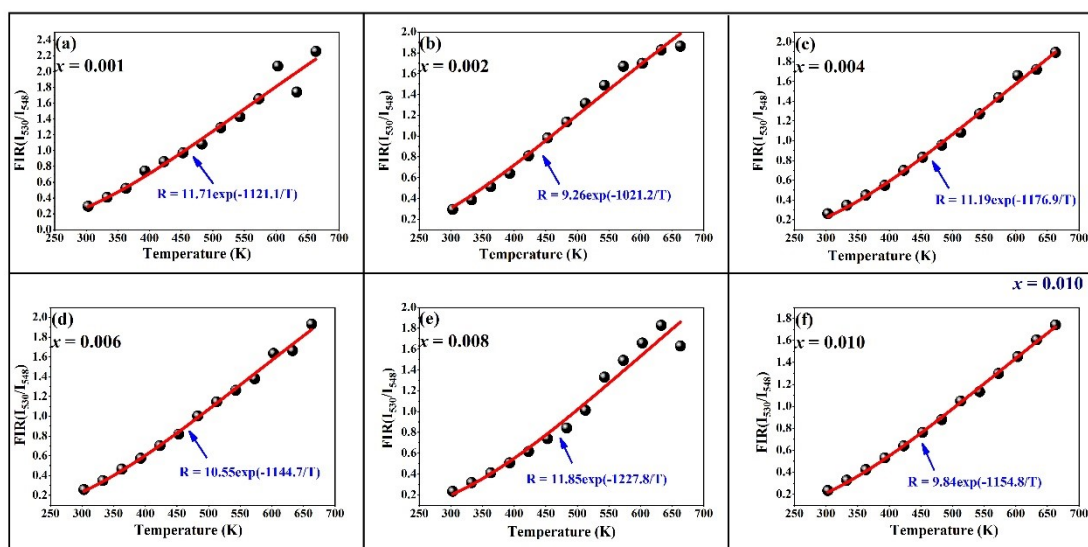

Fig. S11. Temperature dependent FIR for  $x\text{Er}$  ceramics

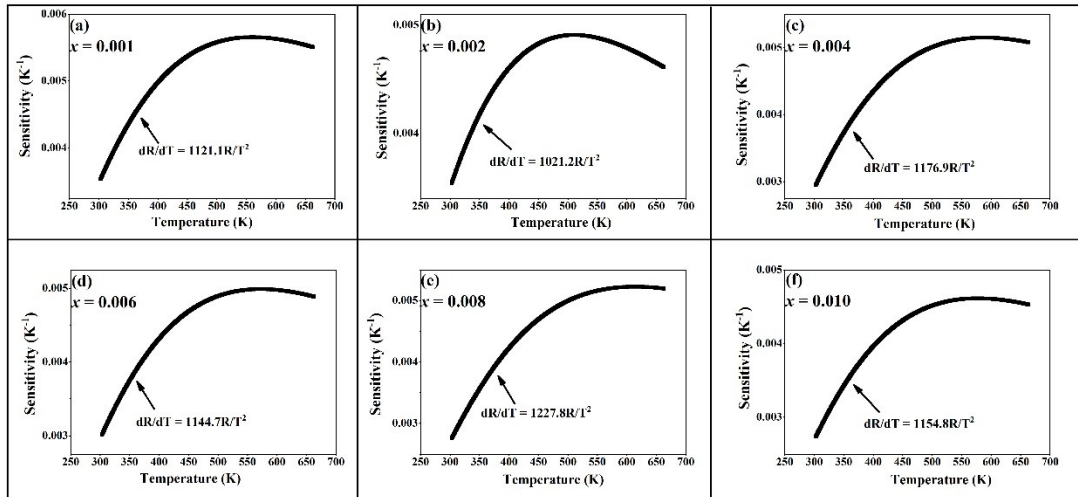

Fig. S12. The sensor sensitivity as a function of temperature for  $xEr$  ceramics

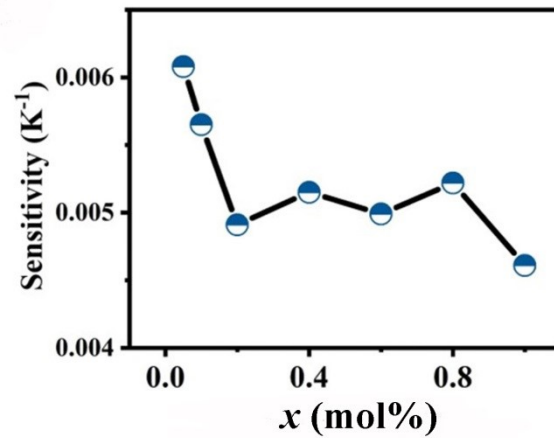

Fig. S13. Change of the maximum sensitivity values with compositions, for  $xEr$  ceramics.

**Table S1** Rietveld refinement parameters of  $x$ Er ceramics.

| <b>Sample</b> | <b><math>R_{wp}</math><br/>(%)</b> | <b><math>R_p</math><br/>(%)</b> | <b><math>\lambda^2</math></b> | <b>Space<br/>group</b> | <b>Phase</b> | <b>Phase<br/>frac. (%)</b> | <b>a (Å)</b> | <b>b (Å)</b> | <b>c (Å)</b> |
|---------------|------------------------------------|---------------------------------|-------------------------------|------------------------|--------------|----------------------------|--------------|--------------|--------------|
| $x=0$         | 4.70                               | 3.63                            | 2.050                         | <i>Amm2</i>            | Orthorhombic | 33%                        | 3.99218      | 5.61034      | 5.72411      |
|               |                                    |                                 |                               | <i>P4mm</i>            | Tetragonal   | 67%                        | 3.97510      | 3.97510      | 3.99934      |
| $x=0.0005$    | 5.04                               | 3.47                            | 2.332                         | <i>Amm2</i>            | Orthorhombic | 19%                        | 3.93122      | 5.65390      | 5.64606      |
|               |                                    |                                 |                               | <i>P4mm</i>            | Tetragonal   | 81%                        | 3.97470      | 3.97470      | 3.99471      |
| $x=0.001$     | 4.80                               | 3.54                            | 1.606                         | <i>P4mm</i>            | Tetragonal   | 100%                       | 3.97228      | 3.97228      | 3.99577      |
| $x=0.002$     | 5.45                               | 4.07                            | 2.567                         | <i>P4mm</i>            | Tetragonal   | 100%                       | 3.98185      | 3.98185      | 3.97303      |
| $x=0.004$     | 5.29                               | 4.13                            | 2.278                         | <i>P4mm</i>            | Tetragonal   | 100%                       | 3.98261      | 3.98261      | 3.96816      |
| $x=0.006$     | 4.33                               | 3.40                            | 1.650                         | <i>P4mm</i>            | Tetragonal   | 100%                       | 3.97080      | 3.97080      | 3.98135      |
| $x=0.008$     | 4.39                               | 3.49                            | 1.902                         | <i>P4mm</i>            | Tetragonal   | 100%                       | 3.97085      | 3.97085      | 3.99083      |
| $x=0.010$     | 4.74                               | 3.69                            | 2.181                         | <i>P4mm</i>            | Tetragonal   | 100%                       | 3.96325      | 3.96325      | 3.98637      |

**Table S2** Rietveld refinement parameters of the  $x = 0.0005$  sample at different temperatures.

| <b><math>T</math> (°C)</b> | <b><math>R_{wp}</math><br/>(%)</b> | <b><math>R_p</math><br/>(%)</b> | <b><math>\lambda^2</math></b> | <b>Space<br/>group</b> | <b>Phase</b> | <b>Phase<br/>frac. (%)</b> | <b>a (Å)</b> | <b>b (Å)</b> | <b>c (Å)</b> |
|----------------------------|------------------------------------|---------------------------------|-------------------------------|------------------------|--------------|----------------------------|--------------|--------------|--------------|
| 25                         | 7.42                               | 5.46                            | 3.345                         | <i>Amm2</i>            | Orthorhombic | 19                         | 3.96628      | 5.62653      | 5.61901      |
|                            |                                    |                                 |                               | <i>P4mm</i>            | Tetragonal   | 81                         | 3.97115      | 3.97115      | 3.99206      |
| 75                         | 7.49                               | 5.61                            | 3.358                         | <i>Amm2</i>            | Orthorhombic | 9                          | 3.96865      | 5.62561      | 5.62571      |
|                            |                                    |                                 |                               | <i>P4mm</i>            | Tetragonal   | 91                         | 3.97208      | 3.97208      | 3.99461      |
| 100                        | 7.89                               | 5.94                            | 2.949                         | <i>P4mm</i>            | Tetragonal   | 100                        | 3.97243      | 3.97243      | 3.99072      |



**Table. S3.** The comparison of optical temperature sensing performance of different Er-doped materials without Yb co-doping.

| RE ions: host                                                                                  | Temperature range (K) | Maximum sensitivity (K <sup>-1</sup> ) | Excitation wavelength (nm) | Refs      |
|------------------------------------------------------------------------------------------------|-----------------------|----------------------------------------|----------------------------|-----------|
| Er: KNNS-0.04BNKZ                                                                              | 303-663               | 0.0061                                 | 980                        | This work |
| Er: BCPT                                                                                       | 100-560               | 0.0035                                 | 980                        | [44]      |
| Er: BNT-BT-SBT                                                                                 | 300-600               | 0.0055                                 | 980                        | [45]      |
| Er: BCT                                                                                        | 103-573               | 0.0033                                 | 980                        | [46]      |
| Er: BT-0.07NT                                                                                  | 120-560               | 0.00042                                | 980                        | [47]      |
| Er: KNLN-NT                                                                                    | 83-583                | 0.0045                                 | 980                        | [48]      |
| Er: KNN-0.4LN                                                                                  | 83-503                | 0.0026                                 | 980                        | [49]      |
| Er: BCT-BZT                                                                                    | 200-443               | 0.0044                                 | 980                        | [16]      |
| Er: NBT nanocrystal                                                                            | 80-480                | 0.0053                                 | 980                        | [50]      |
| Er: Na <sub>0.5</sub> Er <sub>0.5</sub> Bi <sub>4</sub> Ti <sub>4</sub> O <sub>15</sub>        | 173-503               | 0.0017                                 | 980                        | [51]      |
| Er: NBN                                                                                        | 293-753               | 0.00524                                | 980                        | [52]      |
| Er: fluorotellurite glass                                                                      | 293-540               | 0.0054                                 | 800                        | [53]      |
| Er: BTW                                                                                        | 83-423                | 0.0031                                 | 980                        | [54]      |
| Er-Mo: Yb <sub>3</sub> Al <sub>5</sub> O <sub>3</sub>                                          | 295-973               | 0.0048                                 | 976                        | [55]      |
| Er: Na <sub>0.82</sub> Ca <sub>0.08</sub> Er <sub>0.16</sub> Y <sub>0.853</sub> F <sub>4</sub> | 5-300                 | 0.0022                                 | 980                        | [56]      |
| Er: KYb <sub>2</sub> F <sub>7</sub> nano-crystals glass ceramic                                | 300-480               | 0.0043                                 | 980                        | [57]      |

**Table. S4.** The comparison of optical temperature sensing performance of different Er-doped ferroelectric materials.

| RE ions: host         | Temperature range (K) | Maximum sensitivity ( $K^{-1}$ ) | Excitation wavelength (nm) | Refs      |
|-----------------------|-----------------------|----------------------------------|----------------------------|-----------|
| Er: KNNS-0.04BNKZ     | 303-663               | 0.0061                           | 980                        | This work |
| Er/Yb: KNN-0.4LN      | 83-663                | 0.0060                           | 980                        | [49]      |
| Er: KNN-0.4LN         | 83-503                | 0.0026                           | 980                        | [49]      |
| Er: KNLN-NT           | 83-583                | 0.0045                           | 980                        | [48]      |
| Er: NBN               | 293-713               | 0.00524                          | 980                        | [52]      |
| Er: NBT nanocrystal   | 80-480                | 0.0053                           | 980                        | [50]      |
| Er/Yb: NBT            | 175-553               | 0.0035                           | 980                        | [58]      |
| Er: BT-0.07NT         | 120-560               | 0.0042                           | 980                        | [47]      |
| Er/Yb: BT nanocrystal | 120-505               | 0.0048                           | 980                        | [59]      |
| Er/Yb: BCT-BZT        | 173-573               | 0.0068                           | 980                        | [60]      |
| Er: BCPT              | 100-560               | 0.0035                           | 980                        | [44]      |
| Er: BCT-BZT           | 200-443               | 0.0044                           | 980                        | [16]      |
| Er: BNT-BT-SBT        | 300-600               | 0.0055                           | 980                        | [45]      |
| Er/Yb: PLZT           | 140-320               | 0.0022                           | 980                        | [61]      |
| Er: PIN-PMN-PT        | 160-360               | 0.0035                           | 980                        | [62]      |
